# Supplementary material
Source: publisher site journal article supplement (https://www.dovepress.com/article/559844)
Supplement: Supplementary file 1 [file 559844%20supplementary%20tables_1.docx]

### Table S1 Fever status in patients with COPD following infection with influenza A

| Variables | Fever | Non-fever | Unadjusted OR(95%CI)* | P value | Adjusted OR(95%CI)* | P value |
| --- | --- | --- | --- | --- | --- | --- |
| All patients |  |  |  |  |  |  |
| Non-COPD | 133 | 41 | 1.00 |  | 1.00 |  |
| COPD | 49 | 86 | 0.18  (0.11-0.29) | <0.001 | 0.12  (0.06-0.23) | < 0.001 |
| Excluded ICS |  |  |  |  |  |  |
| Non-COPD | 131 | 41 | 1.00 |  | 1.00 |  |
| COPD | 33 | 42 | 0.25  (0.14-0.44) | <0.001 | 0.18  (0.09-0.36) | <0.001 |
| PSM in excluded ICS |  |  |  |  |  |  |
| Non-COPD | 36 | 13 | 1.00 |  | 1.00 |  |
| COPD | 19 | 30 | 0.23  (0.10-0.54) | 0.001 | 0.20  (0.08-0.53) | 0.001 |

COPD：**Patients with chronic obstructive pulmonary disease**

ICS:inhaled corticosteroids;

PSM: propensity score matching‌;

*：fever is the dependent variable

Table S2 ROC analysis of ALC in predicting the prolonged viral shedding for the COPD group with influenza A

| Factor | Population | AUC | 95%CI | P-value | Cut-off | Sensitivity（%） | Specificity（%） | Youden Index |
| --- | --- | --- | --- | --- | --- | --- | --- | --- |
| ALC | All patients | 0.751 | 0.697-0.805 | 0.000 | 0.725 | 69.0 | 76.8 | 0.458 |
| COPD group | 0.771 | 0.688-0.854 | 0.000 | 0.750 | 71.3 | 78.0 | 0.493 |

COPD:**Chronic Obstructive Pulmonary Disease**

ALC:Absolute Lymphocyte Count
